# Supplementary material
Source: PubMed Central journal article supplement (PMC3930074)
Supplement: NIHMS544219-supplement-Supp__Data.pdf [file NIHMS544219-supplement-Supp__Data.pdf]

## Supplementary information S1 | 17 clinical trials with istradefylline, KW6002, in advanced Parkinson's disease patients

| No. | ClinicalTrials.gov ID | Trial name                                                                                                                                             |
|-----|-----------------------|--------------------------------------------------------------------------------------------------------------------------------------------------------|
| 1   | NCT00455507           | A Phase 2b Study of Istradefylline (KW-6002) for the Treatment of Parkinson's Disease in Patients Taking Levodopa                                      |
| 2   | NCT00955526           | Study of KW-6002 (Istradefylline) for the Treatment of Parkinson's Disease in Patients Taking Levodopa                                                 |
| 3   | NCT00199420           | A Study of Istradefylline (KW-6002) in Treating Patients With Parkinson's Disease on Levodopa                                                          |
| 4   | NCT00250393           | A Study of Istradefylline (KW-6002) for the Treatment of Parkinson's Disease                                                                           |
| 5   | NCT00199355           | A Study of Istradefylline (KW-6002) for the Treatment of Parkinson's Disease in Patients Taking Levodopa                                               |
| 6   | NCT00199407           | A Study of Istradefylline (KW-6002) for the Treatment of Parkinson's Disease in Patients Taking Levodopa                                               |
| 7   | NCT00957203           | Long-Term Safety Study of KW-6002 (Istradefylline) in Parkinson's Disease Patients                                                                     |
| 8   | NCT00199381           | An Extension of Istradefylline in North American Parkinson's Disease Patients Who Have Completed Study 6002-INT-001                                    |
| 9   | NCT00199394           | A Study of Istradefylline (KW-6002) for the Treatment of Parkinson's Disease                                                                           |
| 10  | NCT00203957           | Study of KW-6002 (Istradefylline) in Parkinson's Disease in Patients With Motor Response Complications on Levodopa                                     |
| 11  | NCT00199446           | Study of Istradefylline (KW-6002) for the Treatment of Restless Legs Syndrome                                                                          |
| 12  | NCT00199433           | A Study of Istradefylline (KW-6002) as Monotherapy in Parkinson's Disease (PD) Patients                                                                |
| 13  | NCT00456586           | 12-Week, Double-Blind, Placebo-Controlled, Randomized Study of the Efficacy of 40 mg/Day KW-6002 in Parkinson's Disease Patients on Levodopa/Carbidopa |
| 14  | NCT00199368           | An Extension of Istradefylline in Parkinson's Disease Patients Who Have Completed Studies 6002-EU-007, 6002-US-013 or 6002-US-018                      |
| 15  | NCT00955045           | A Long-Term, Safety Study With a Flexible Dose Range of KW-6002 in Patients With Motor Response Complications on Levodopa/Carbidopa Therapy            |
| 16  | NCT00456794           | 12-Week, Double-Blind, Placebo-Controlled Study of 20 and 60 mg/Day Istradefylline in Parkinson's Disease Patients on Levodopa/Carbidopa               |
| 17  | NCT00006337           | KW-6002 to Treat Parkinson's Disease                                                                                                                   |
